# Supplementary material for: Association of Cardiorespiratory Fitness With Long-term Mortality Among Adults Undergoing Exercise Treadmill Testing
Source: PubMed Central journal article supplement (PMC6324439; doi:10.1001/jamanetworkopen.2018.3605), 2018-10-19
Supplement: jamanetwopen-1-e183605-s001.pdf [file jamanetwopen-1-e183605-s001.pdf]

## Supplementary Online Content

Mandsager K, Harb S, Cremer P, Phelan D, Nissen SE, Jaber W. Association of cardiorespiratory fitness with long-term mortality among adults undergoing exercise treadmill testing. *JAMA Netw Open*. 2018;1(6):e20183605.

**eMethods.** Definitions of Comorbid Conditions

**eFigure 1.** Kaplan-Meier Curves by Indication for Exercise Treadmill Testing

**eFigure 2.** Study Cohort Flow Chart

**eFigure 3.** Mean Age of the Cohort by Year of Study

**eFigure 4.** Trends in Male Referral and Comorbidities by Year of Study

**eFigure 5.** Trends in Medication Use by Year of Exercise Treadmill Testing

**eFigure 6.** Risk-Adjusted All-Cause Mortality by Elite Performance Cutoff

**eFigure 7.** Adjusted Risk of Death in Patients With Comorbidities

**eTable.** Most Common Indications for Exercise Stress Testing

This supplementary material has been provided by the authors to give readers additional information about their work.

## **eMethods.** Definitions of Comorbid Conditions

*Coronary Artery Disease:* prior myocardial infarction or prior coronary revascularization

*Diabetes Mellitus:* self-reported history or use of glucose-lowering medications

*Hypertension:* self-reported history or use of anti-hypertensive medications (angiotensin converting enzyme inhibitors, angiotensin receptor blockers, calcium channel blockers, or thiazide diuretics)

*Hyperlipidemia:* Abnormal lipid panel (meeting accepted diagnostic criteria at the time of treadmill testing) or use of statin medications

*Smoker:* current or prior tobacco use

*End-stage renal disease:* receiving dialysis

**eFigure 1.** Kaplan-Meier Curves by Indication for Exercise Treadmill Testing

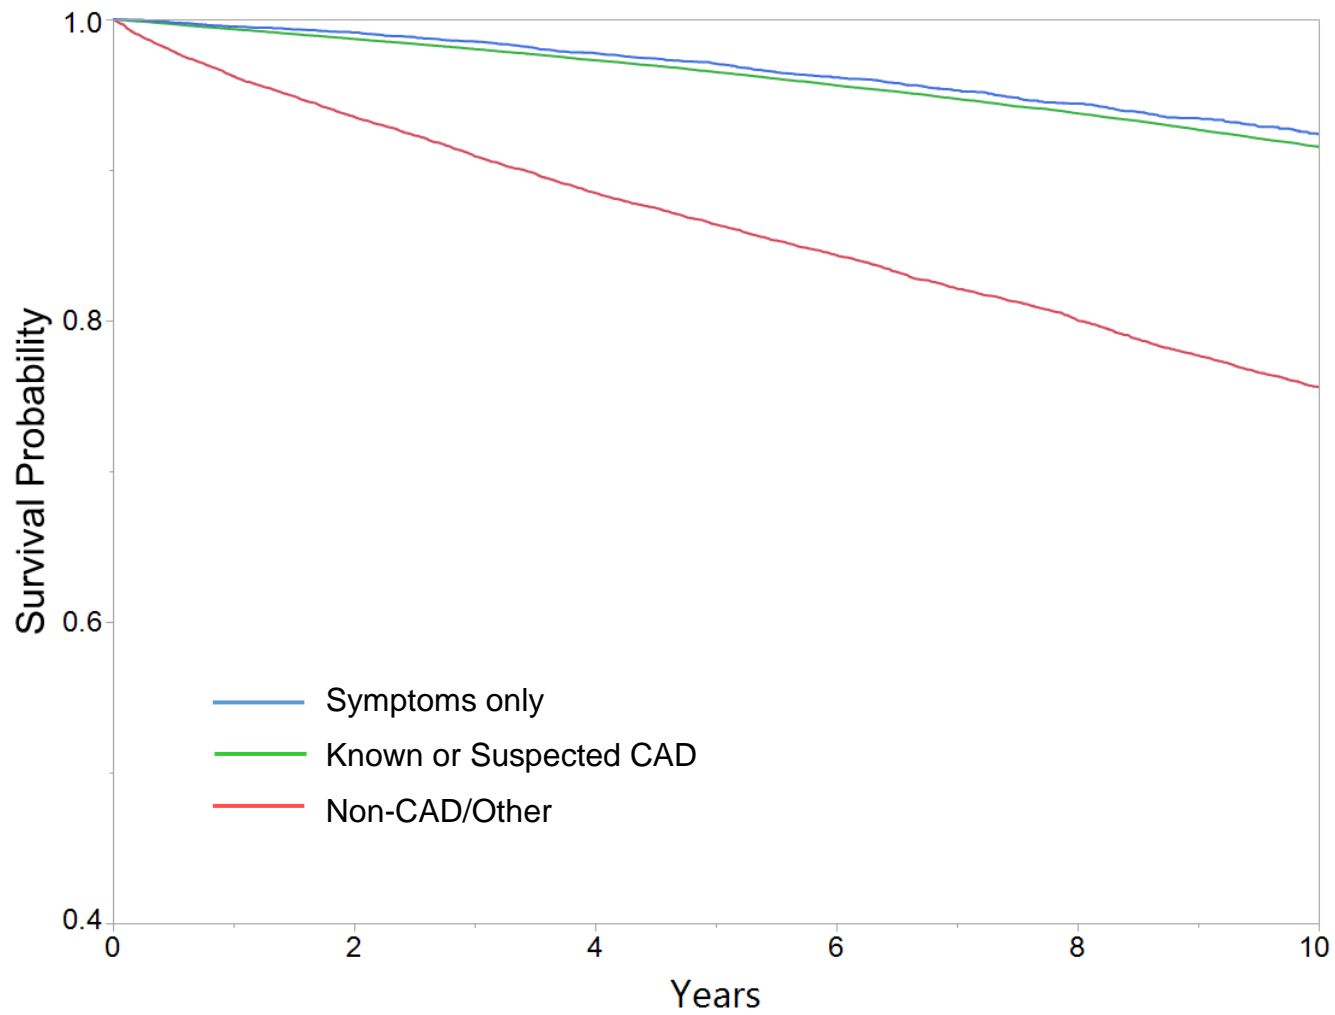

Log rank  $p < 0.0001$ . CAD = coronary artery disease

**eFigure 2.** Study Cohort Flow Chart

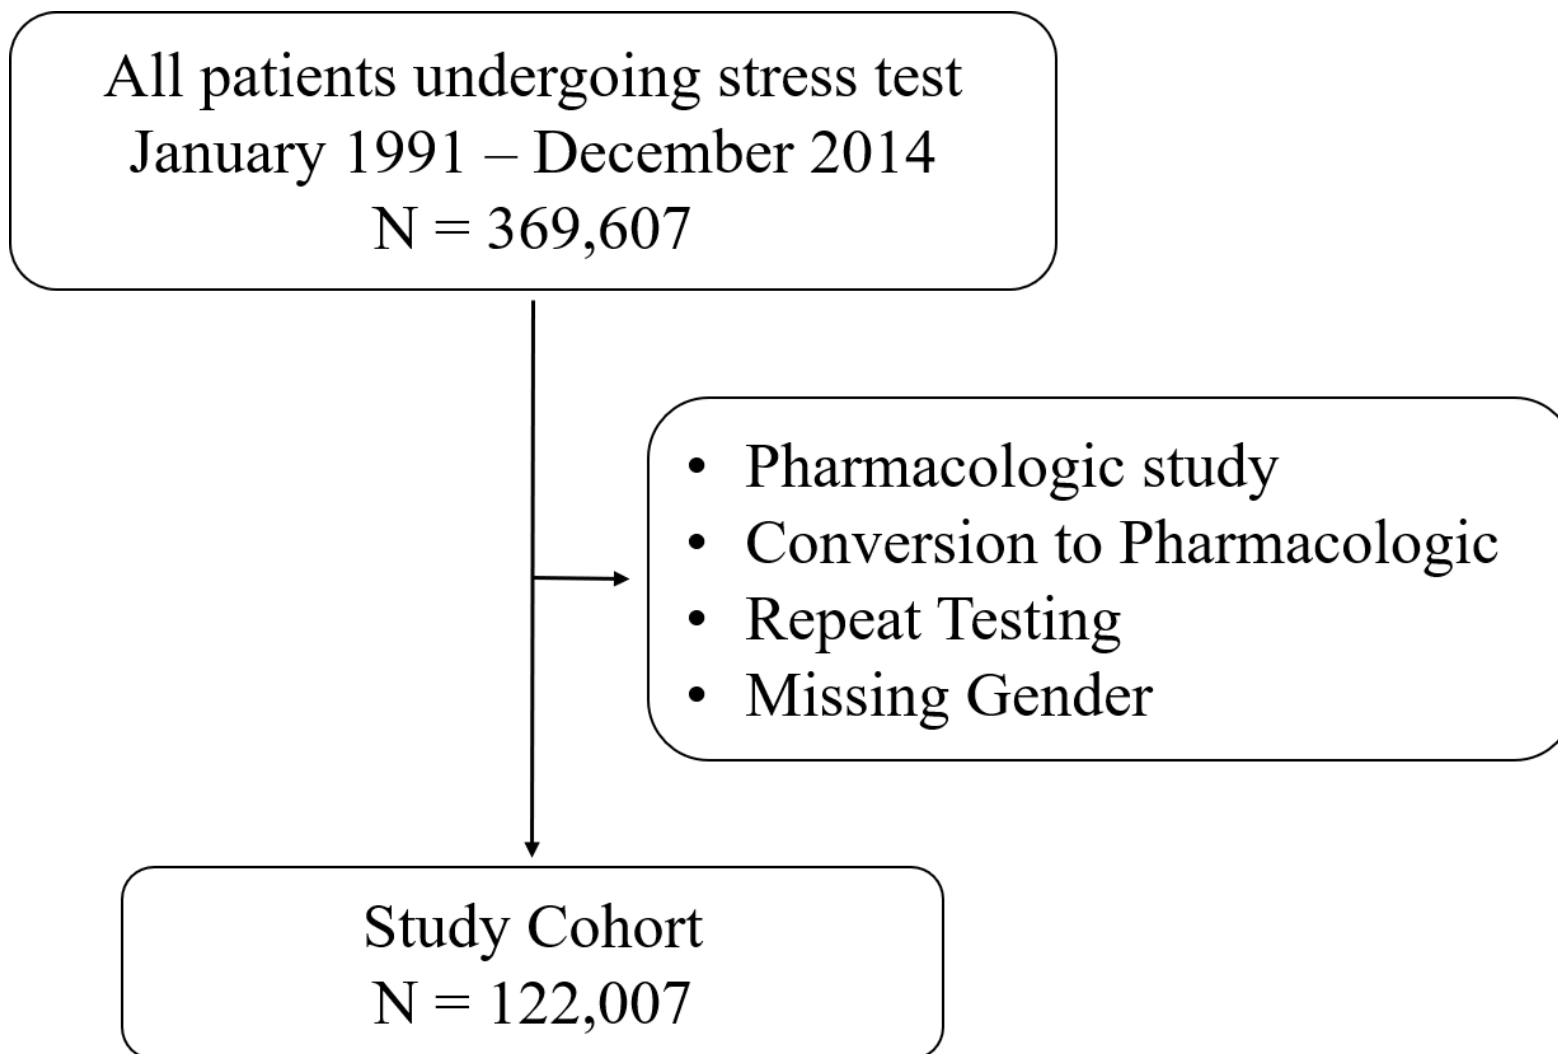

**eFigure 3.** Mean Age of the Cohort by Year of Study

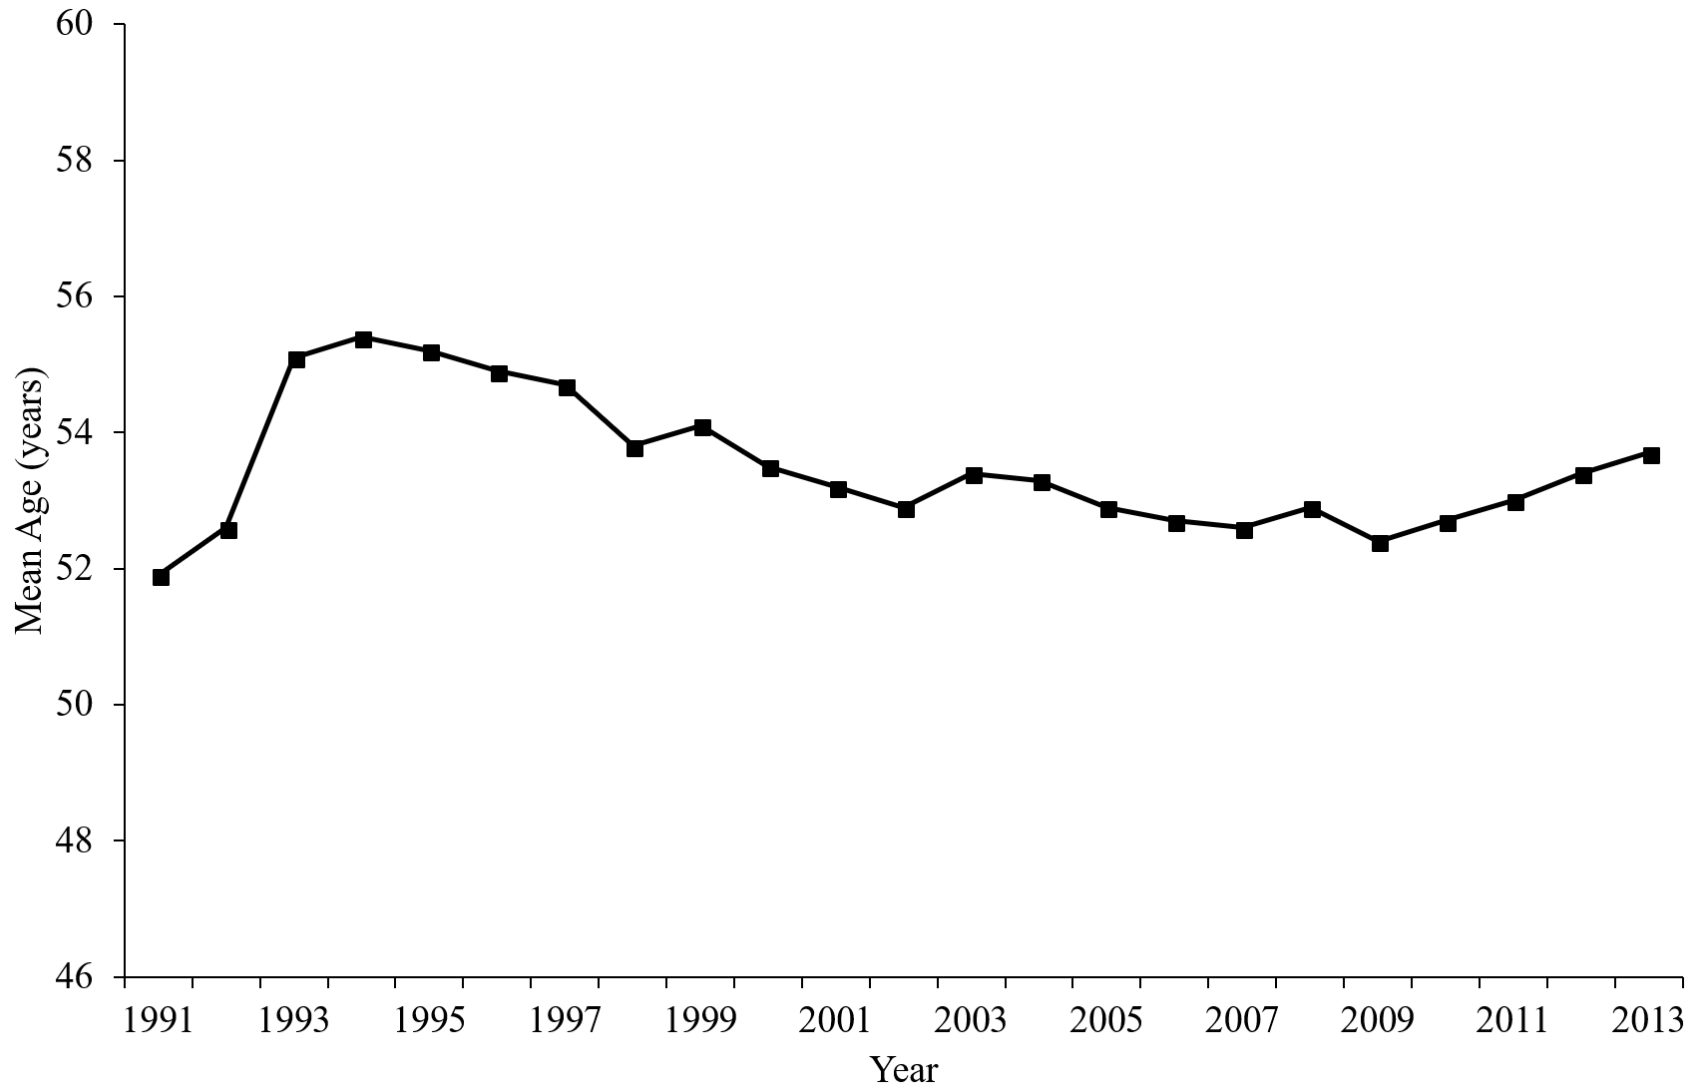

**eFigure 4.** Trends in Male Referral and Comorbidities by Year of Study

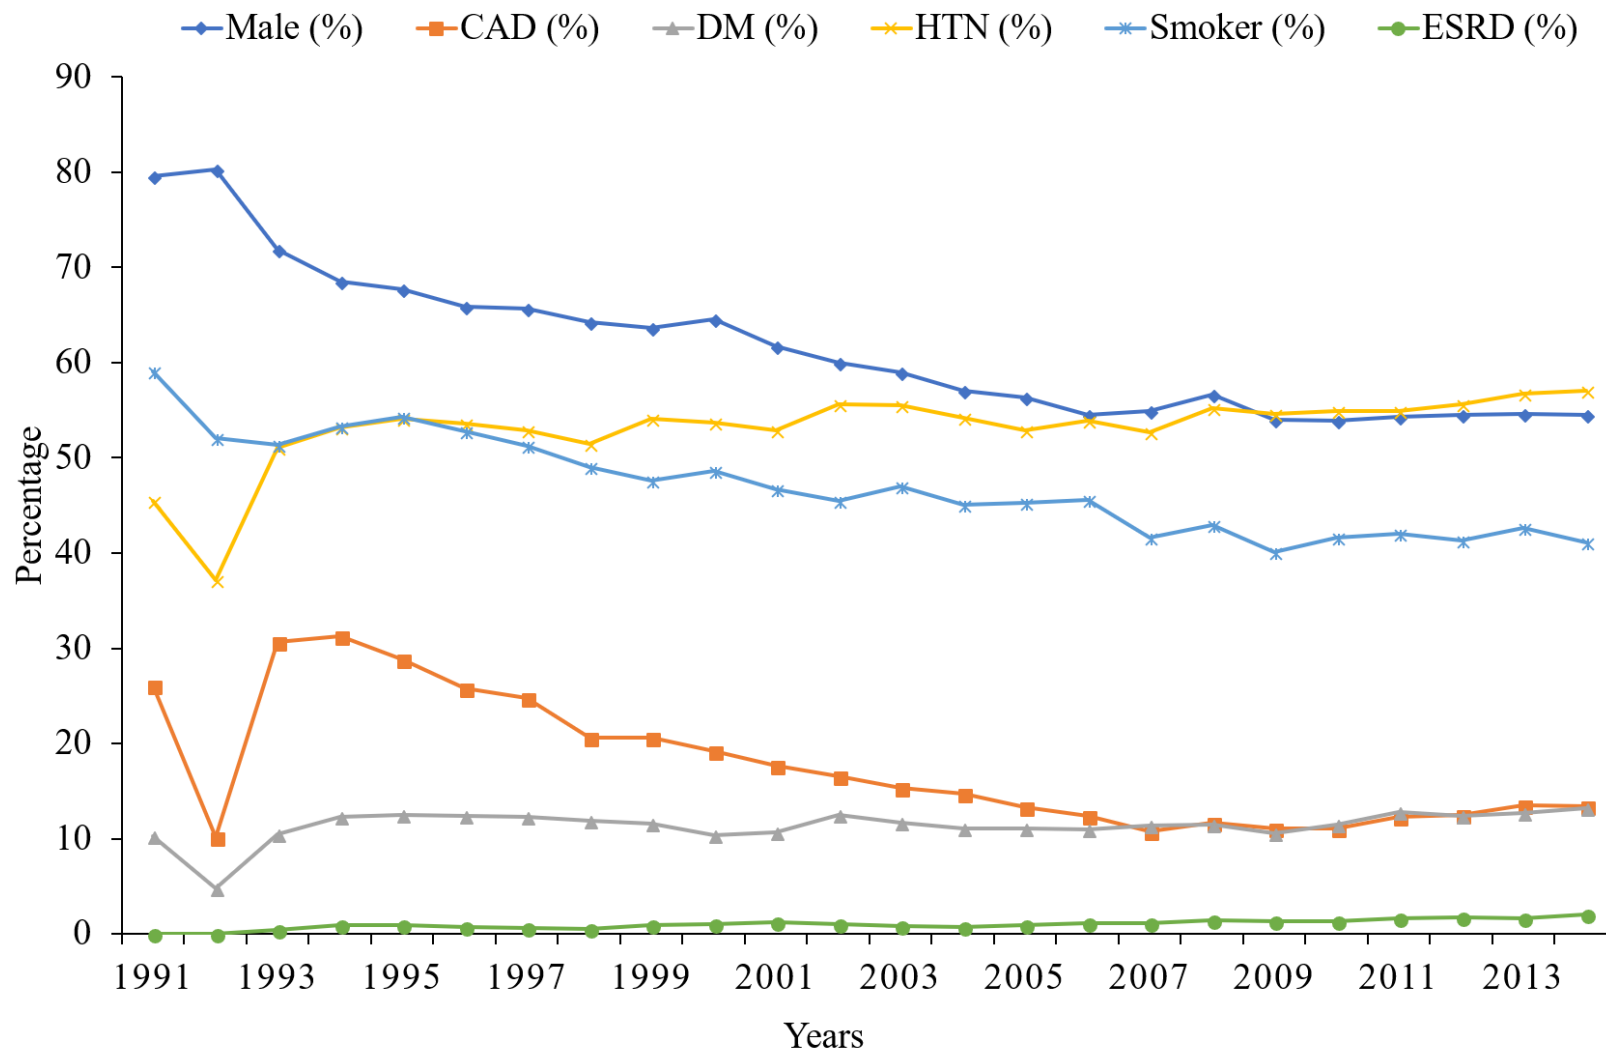

CAD = coronary artery disease; DM = Diabetes Mellitus; HTN = Hypertension; ESRD = end-stage renal disease.

**eFigure 5.** Trends in Medication Use by Year of Exercise Treadmill Testing

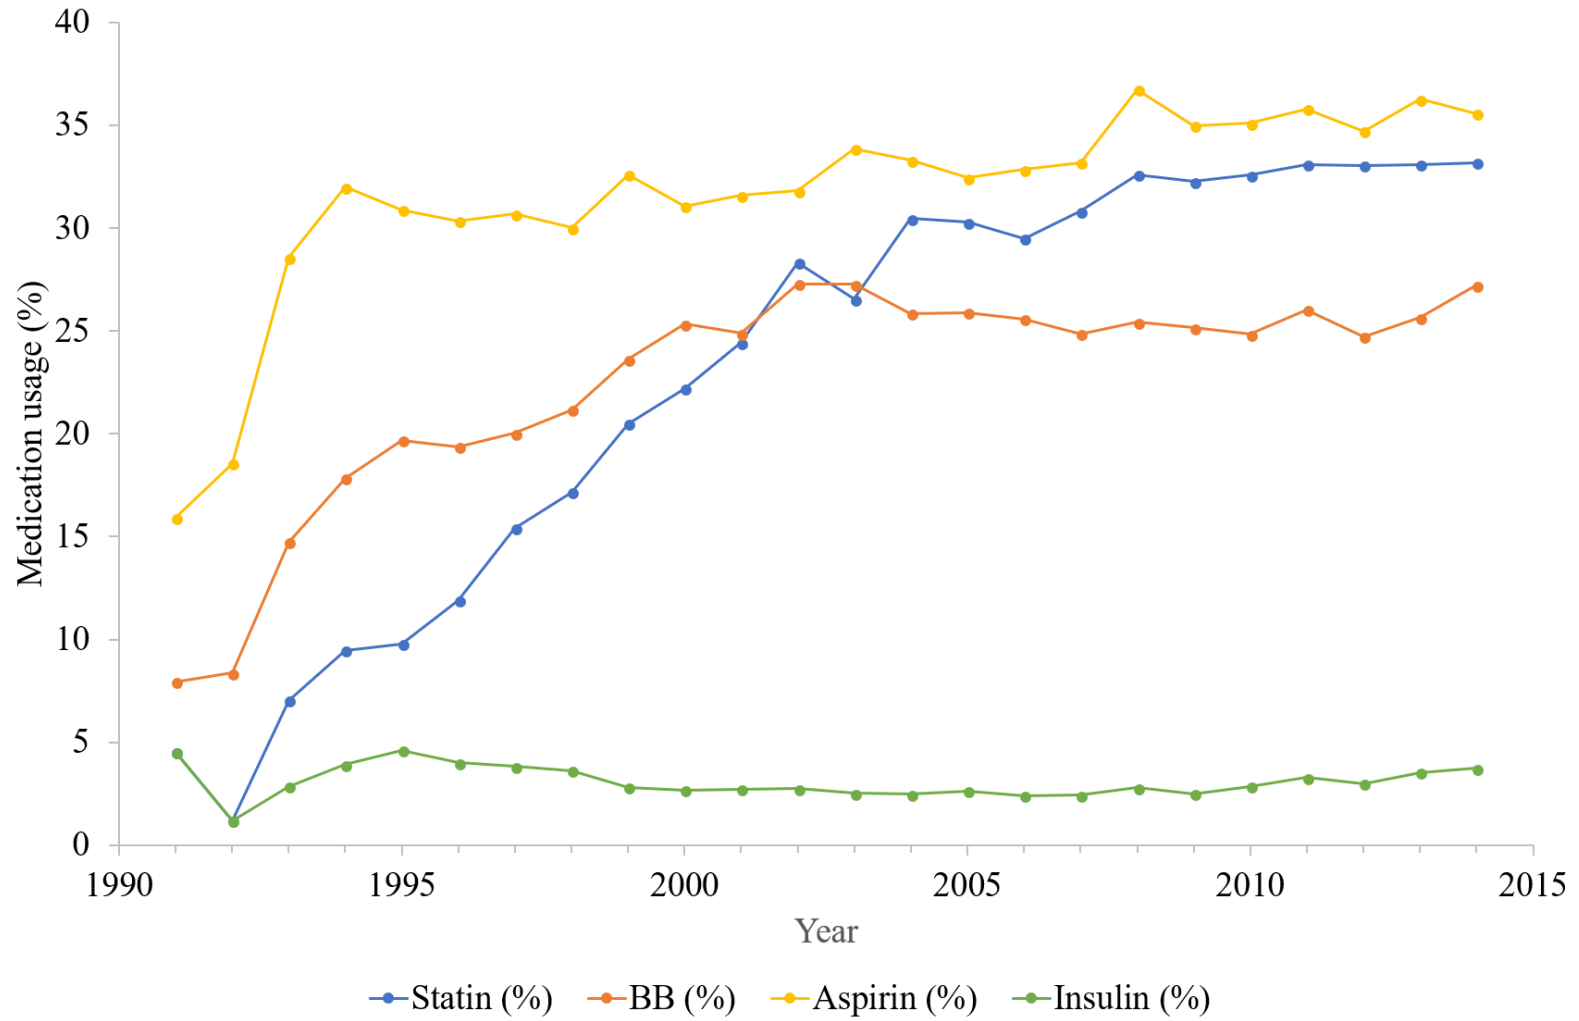

BB = Beta-blocker

**eFigure 6.** Risk-Adjusted All-Cause Mortality by Elite Performance Cutoff

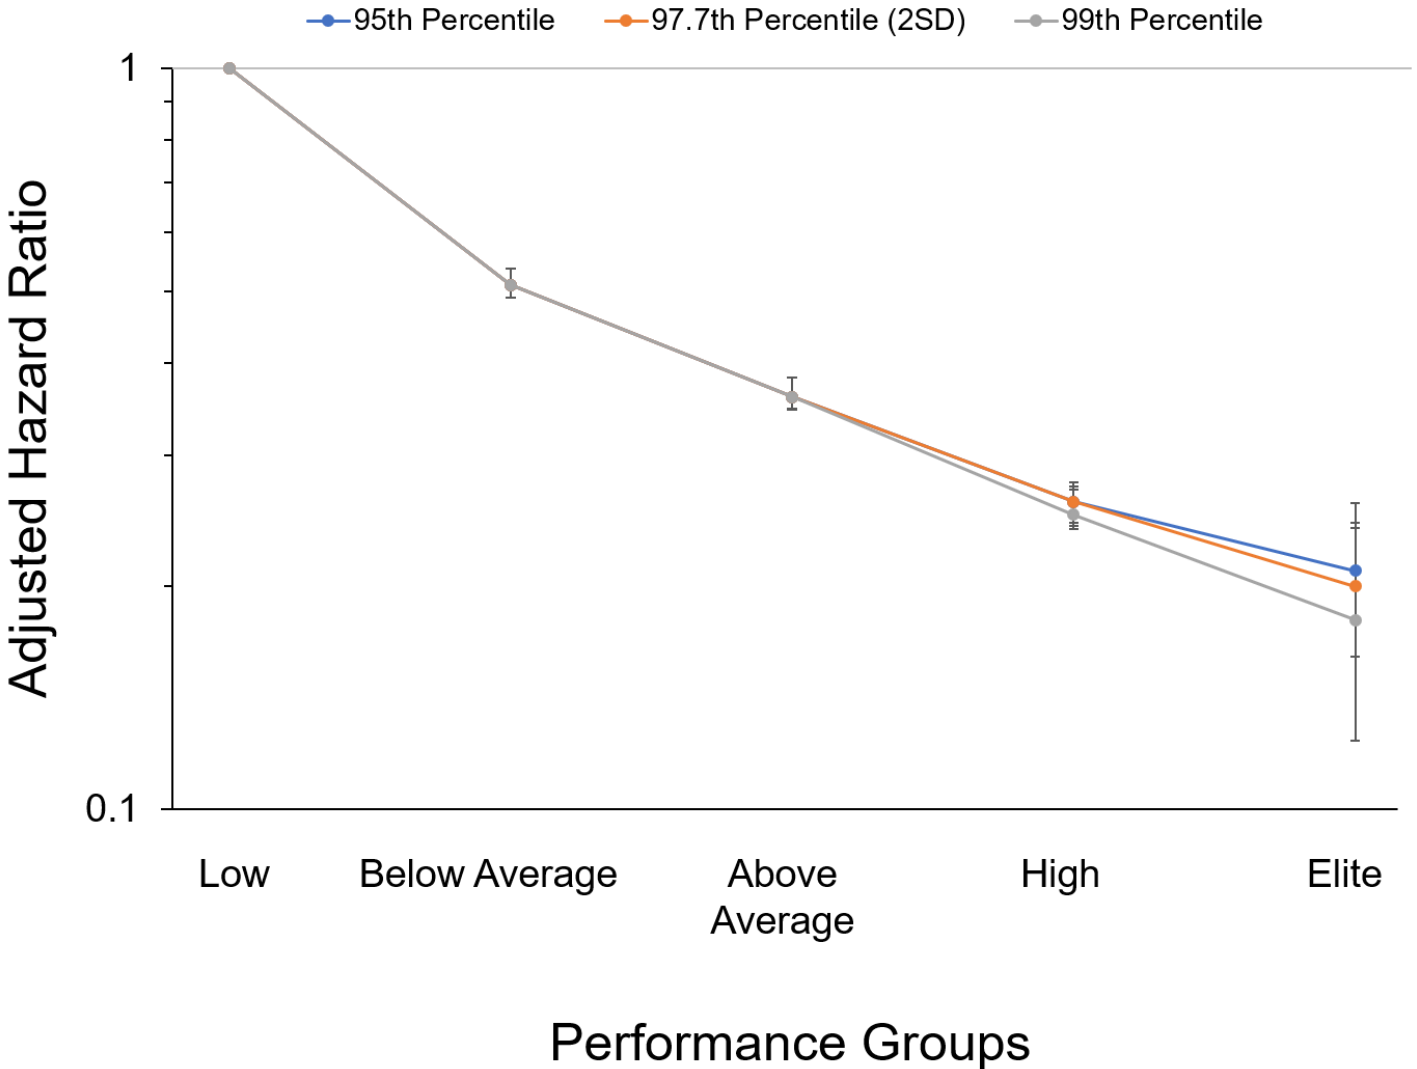



**eFigure 7. Adjusted Risk of Death in Patients With Comorbidities**

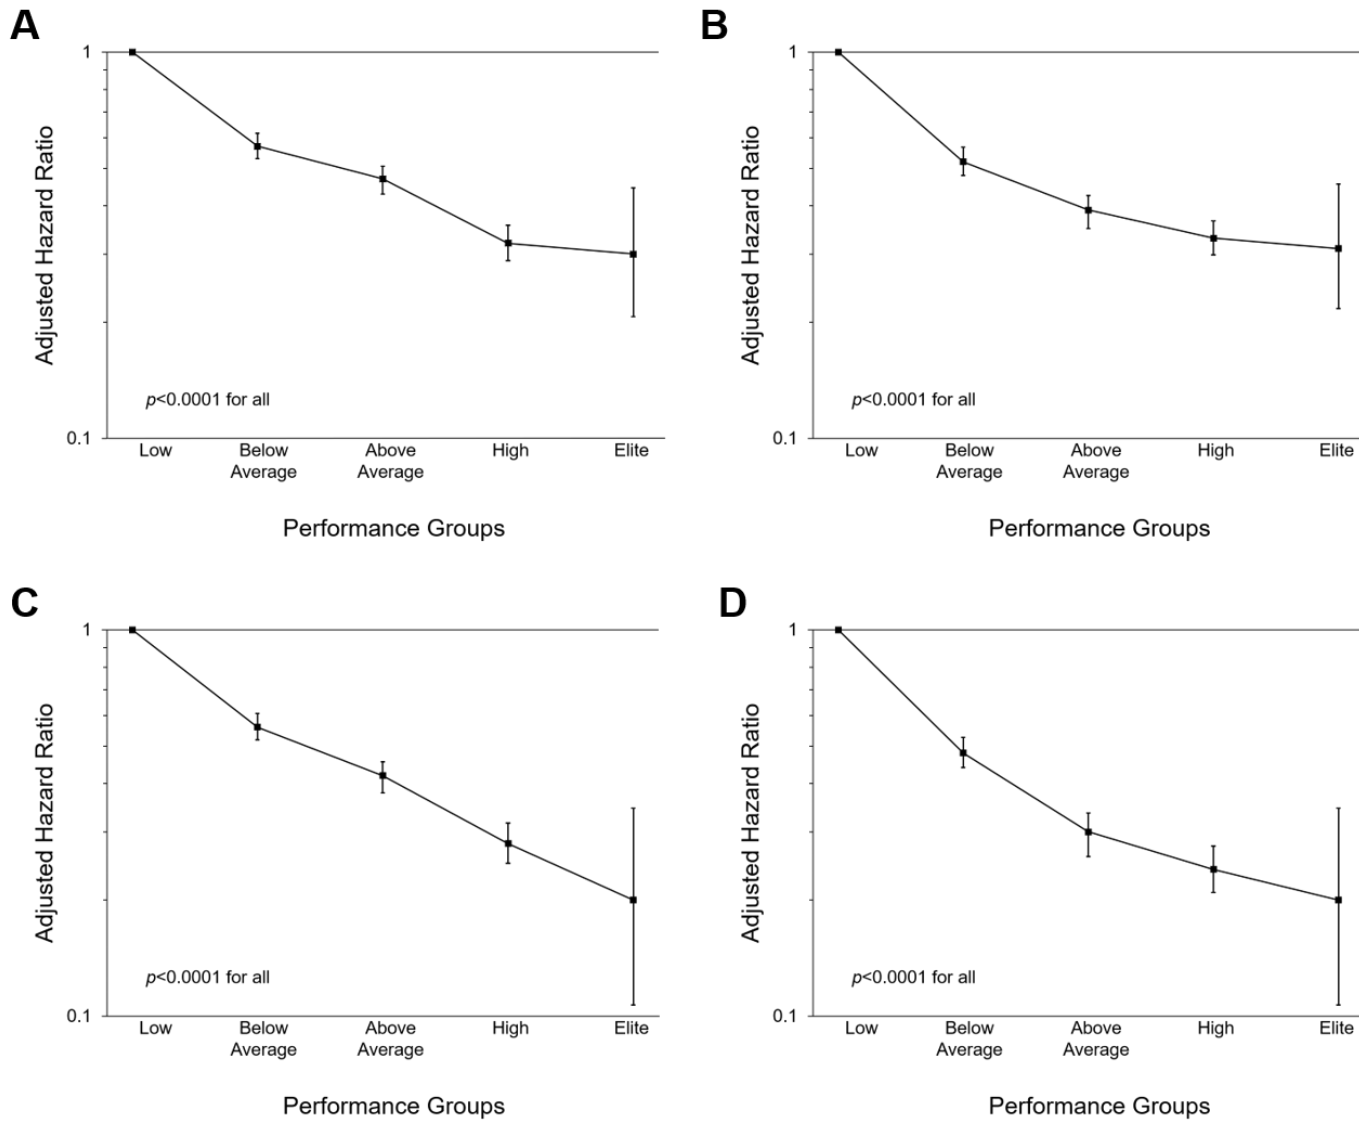

Patients with (A) coronary artery disease; (B) diabetes; (C) hypertension; (D) hyperlipidemia.  $p$ -values compared to low performers.

**eTable.** Most Common Indications for Exercise Stress Testing

| Indication for exercise stress testing | No. (%)       |
|----------------------------------------|---------------|
| Rule out CAD                           | 80,197 (65.8) |
| Symptom evaluation                     | 62,461 (51.2) |
| Risk factors for CAD                   | 20,507 (16.8) |
| Follow-up known CAD                    | 15,941 (13.0) |
| Others*                                | 15,474 (12.7) |

Indications are not mutually exclusive. \*Others with  $\geq 4\%$ : preoperative clearance (4%), arrhythmia evaluation (5%) and valvular disease (8%).

CAD = coronary artery disease.
